# Supplementary material
Source: publisher figshare collection journal article supplement (https://future-science-group.figshare.com/ndownloader/files/27699510)
Supplement: Supplementary file 1 [file 27699510]

**Supplementary table 3. Associations of differentially methylated positions (DMPs) with SNPs and INDELs in the GoDMC database.**

| **No** | **CpG ID** | **Chromosome** | **Position1** | **Gene Annotation** | **Number of SNP & INDEL associations in cis** | **Number of SNP and INDEL associations in trans** |
| --- | --- | --- | --- | --- | --- | --- |
| 1 | cg16411857 | 16 | 57023191 | *NLRC5* | 8 | 9 |
| 2 | cg15706807 | 8 | 58106598 | *IMPAD1* | 990 | 0 |
| 3 | cg07839457 | 16 | 57023022 | *NLRC5* | 13 | 27 |
| 4 | cg07295964 | 5 | 175223982 | *CPLX2* | 0 | 0 |
| 5 | cg03024619 | 3 | 71803308 | *EIF4E3* | 0 | 0 |
| 6 | cg13273540 | 3 | 176850227 | *TBL1XR1* | 104 | 0 |
| 7 | cg16861076 | 8 | 11421594 | *BLK* | 79 | 0 |
| 8 | cg01787285 | 1 | 2162682 | *SKI* | 165 | 0 |
| 9 | cg15723874 | 1 | 156457945 | *MEF2D* | 0 | 0 |
| 10 | cg01088410 | 5 | 170739179 | *TLX3* | 0 | 0 |
| 11 | cg10333808 | 12 | 22487459 | *ST8SIA1* | 0 | 0 |
| 12 | cg22895601 | 14 | 21131621 | *ANG* | 0 | 0 |
| 13 | cg13985485 | 1 | 239550283 | *CHRM3* | 0 | 0 |

Table depicts DMPs that were significantly associated with SNPs and INDELs in cis and trans genes in the GODMC database. <http://mqtldb.godmc.org.uk/index.php>. Statisticall signicance at 1.1E-14 after taking into account Bonferroni corrections. SNPs= Single nucleotide polymorphisms., INDEL = Insert and deletion of nucleotides.
